# Supplementary material for: Identification of Human Brain Proteins for Bitter-Sweet Taste Perception: A Joint Proteome-Wide and Transcriptome-Wide Association Study
Source: MDPI journal article supplement (doi:10.3390/nu14102177), 2022-05-23
Supplement: s1 [file s1]

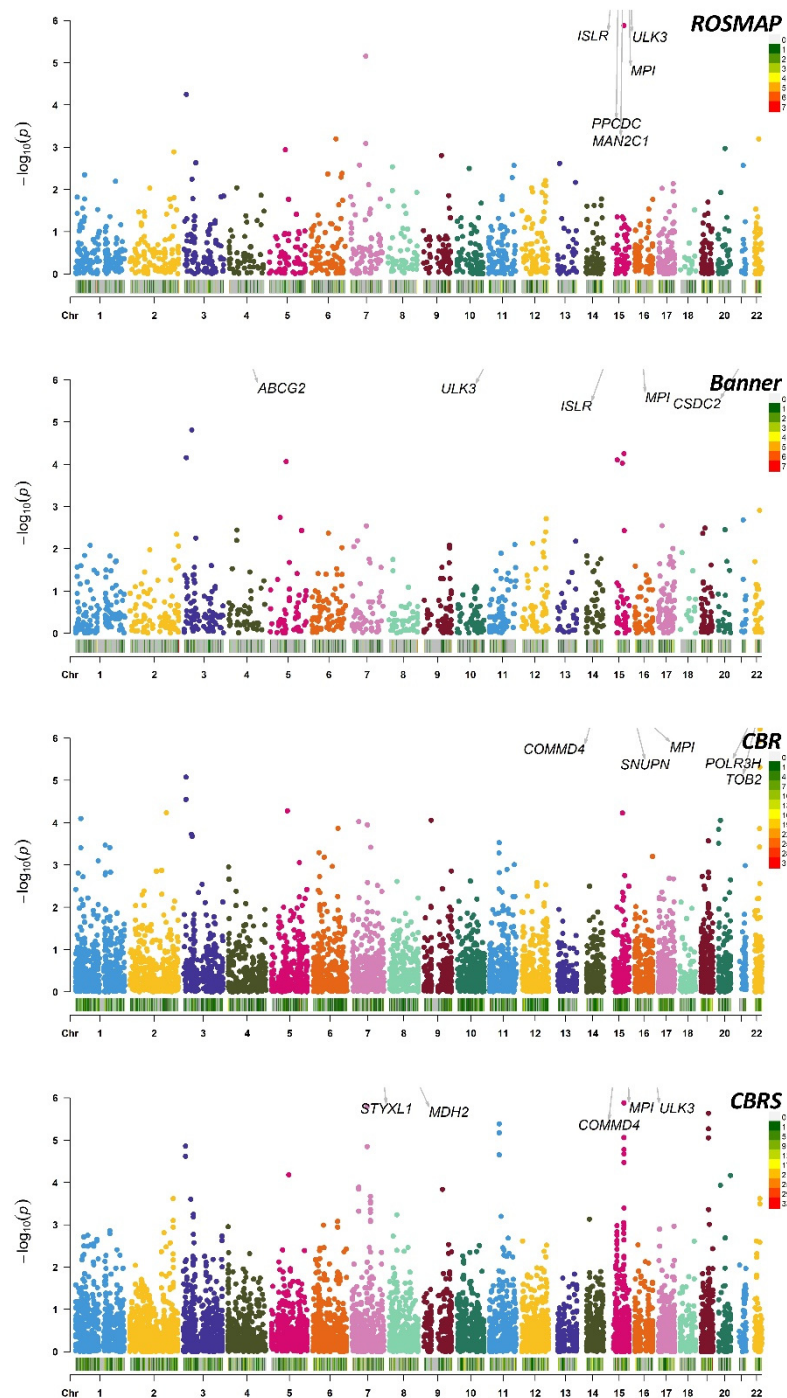

**Figure S1. Manhattan Plots of significant human brain proteins identified in PWAS and TWAS analysis for total bitter beverages**

Note: PWAS, proteome-wide association study; TWAS, transcriptome-wide association study. ROS/MAP and Banner means human brain proteomes for PWAS analysis; CBR and CBRS means two datasets of human brain gene expressions for TWAS analysis. Each point corresponds to a single test of association between a gene and phenotype, plotted according to genomic position on the x-axis and the strength of association ( $-\log_{10} P$ -value) on the y-axis. The five most statistically significant genes/proteins resulting from the analysis of each cohort were mapped out.

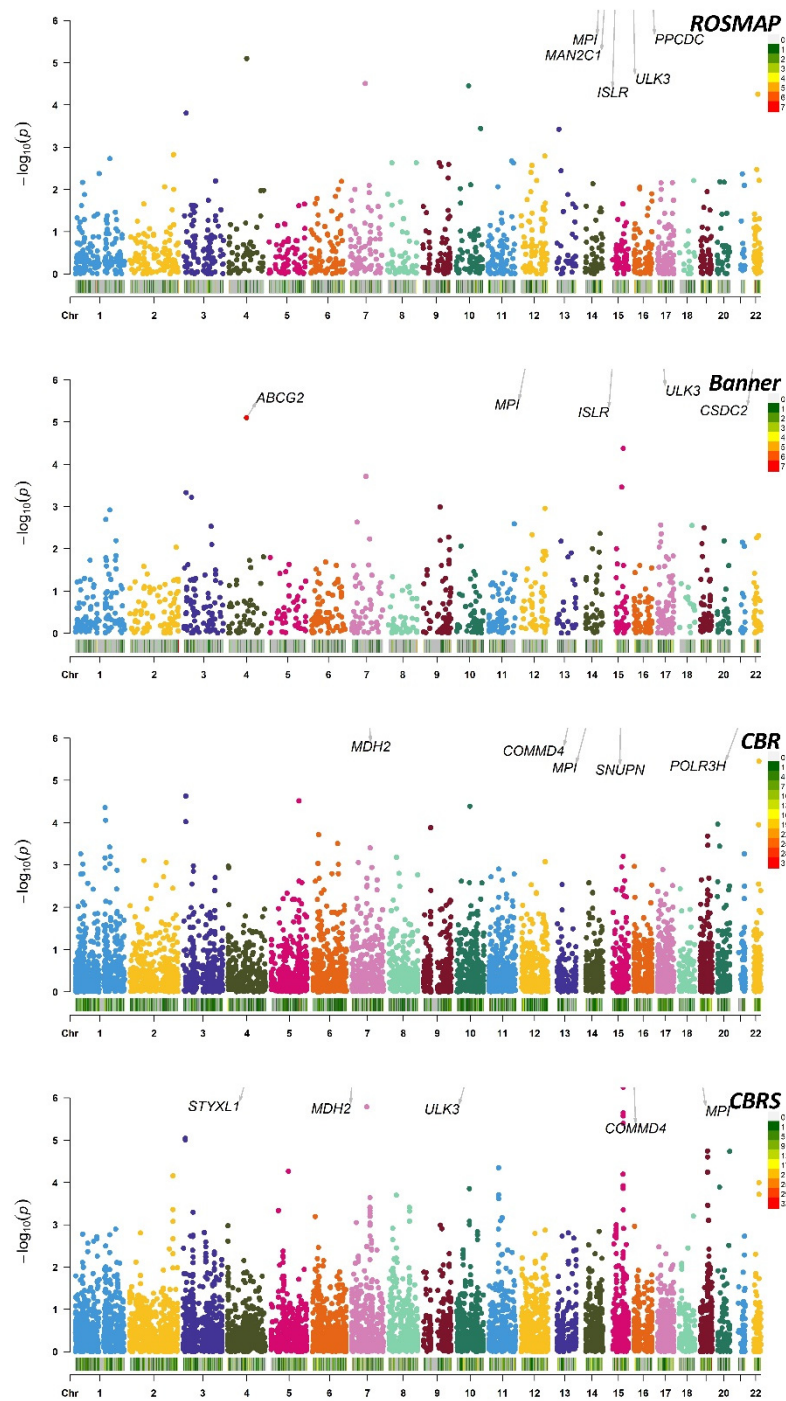

**Figure S2. Manhattan Plots of significant human brain proteins identified in PWAS and TWAS analysis for non-alcoholic bitter beverages**

Note: PWAS, proteome-wide association study; TWAS, transcriptome-wide association study. ROS/MAP and Banner means human brain proteomes for PWAS analysis; CBR and CBRS means two datasets of human brain gene expressions for TWAS analysis. Each point corresponds to a single test of association between a gene and phenotype, plotted according to genomic position on the x-axis and the strength of association ( $-\log_{10} P$ -value) on the y-axis. The five most statistically significant genes/proteins resulting from the analysis of each cohort were mapped out.

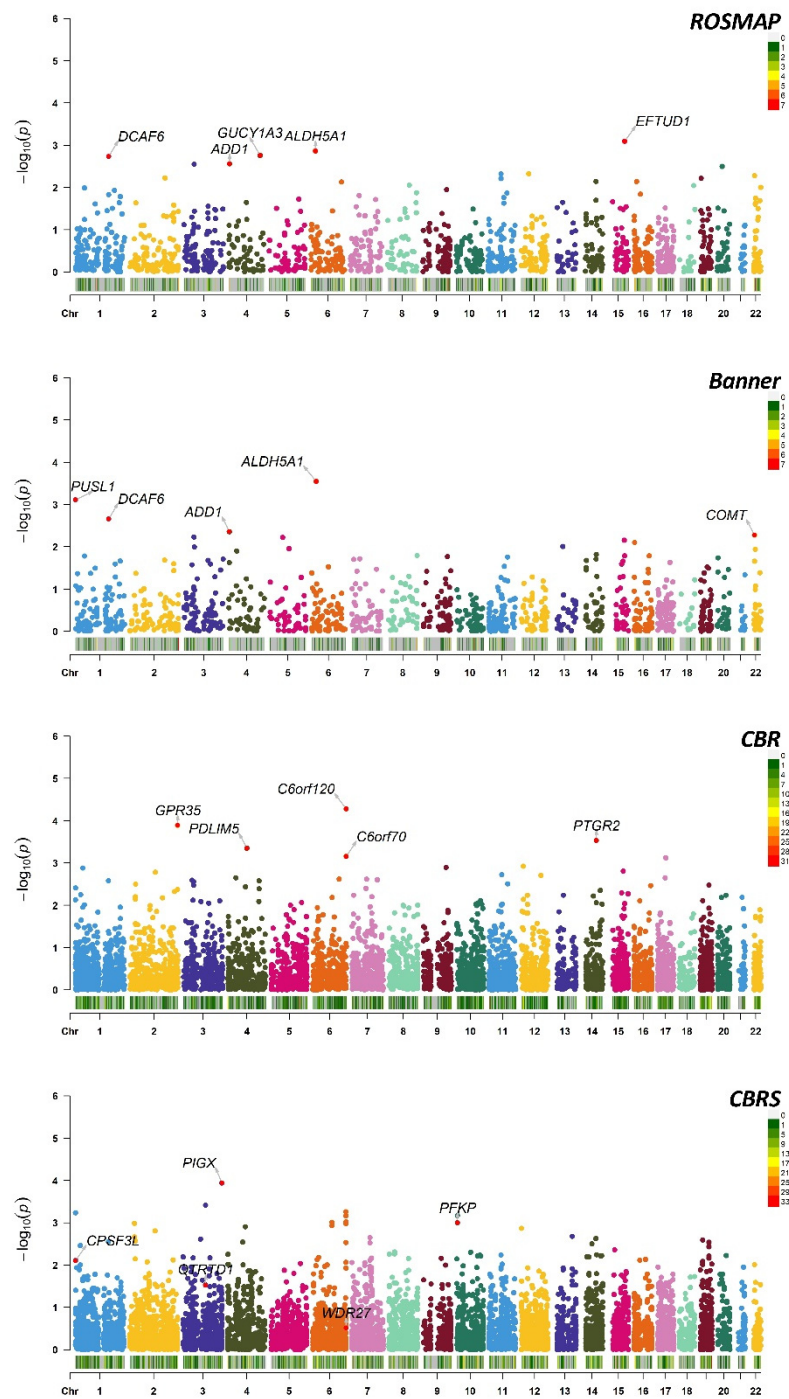

**Figure S3. Manhattan Plots of significant human brain proteins identified in PWAS and TWAS analysis for non-grape juices**

Note: PWAS, proteome-wide association study; TWAS, transcriptome-wide association study. ROS/MAP and Banner means human brain proteomes for PWAS analysis; CBR and CBRS means two datasets of human brain gene expressions for TWAS analysis. Each point corresponds to a single test of association between a gene and phenotype, plotted according to genomic position on the x-axis and the strength of association ( $-\log_{10} P$ -value) on the y-axis. The five most statistically significant genes/proteins resulting from the analysis of each cohort were mapped out.

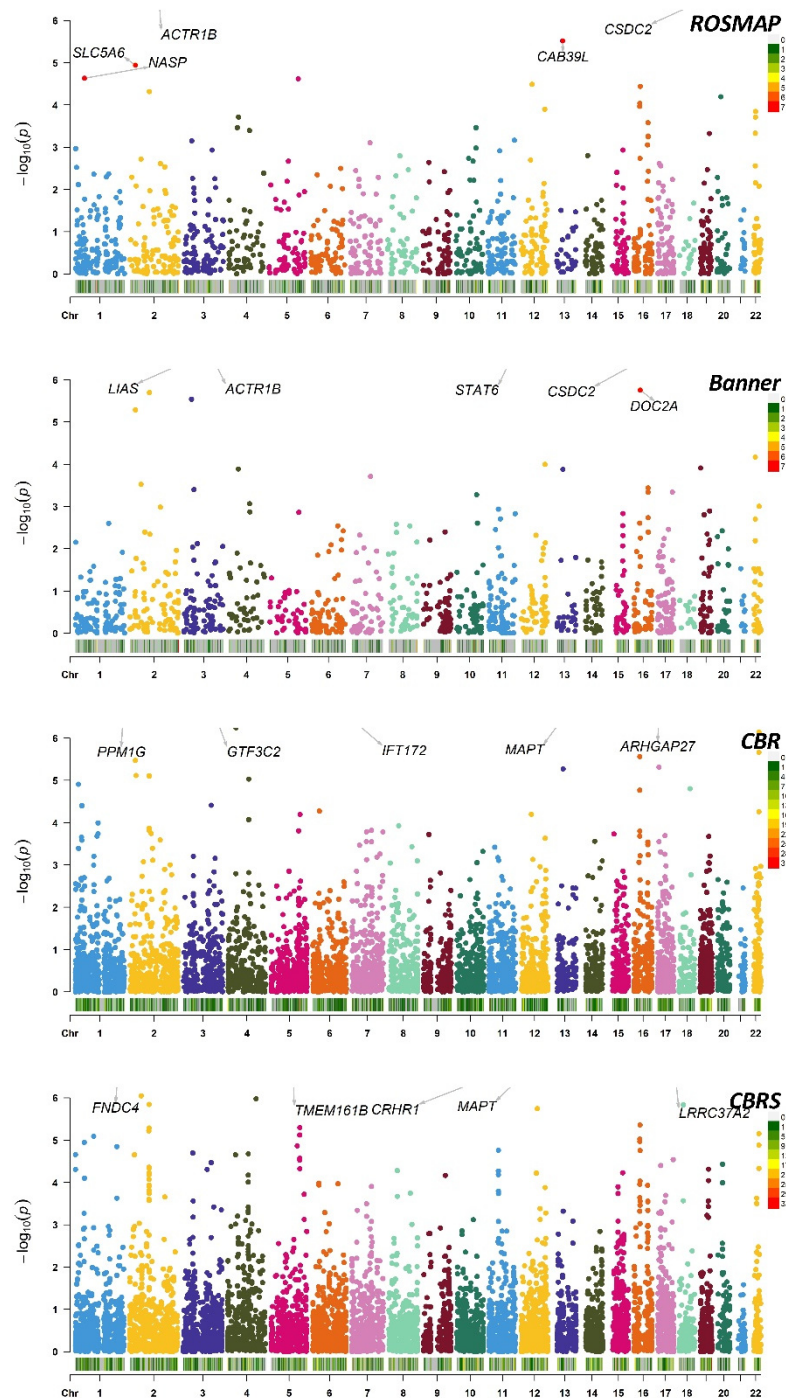

**Figure S4. Manhattan Plots of significant human brain proteins identified in PWAS and TWAS analysis for alcoholic bitter beverages**

Note: PWAS, proteome-wide association study; TWAS, transcriptome-wide association study. ROS/MAP and Banner means human brain proteomes for PWAS analysis; CBR and CBRS means two datasets of human brain gene expressions for TWAS analysis. Each point corresponds to a single test of association between a gene and phenotype, plotted according to genomic position on the x-axis and the strength of association ( $-\log_{10} P$ -value) on the y-axis. The five most statistically significant genes/proteins resulting from the analysis of each cohort were mapped out.



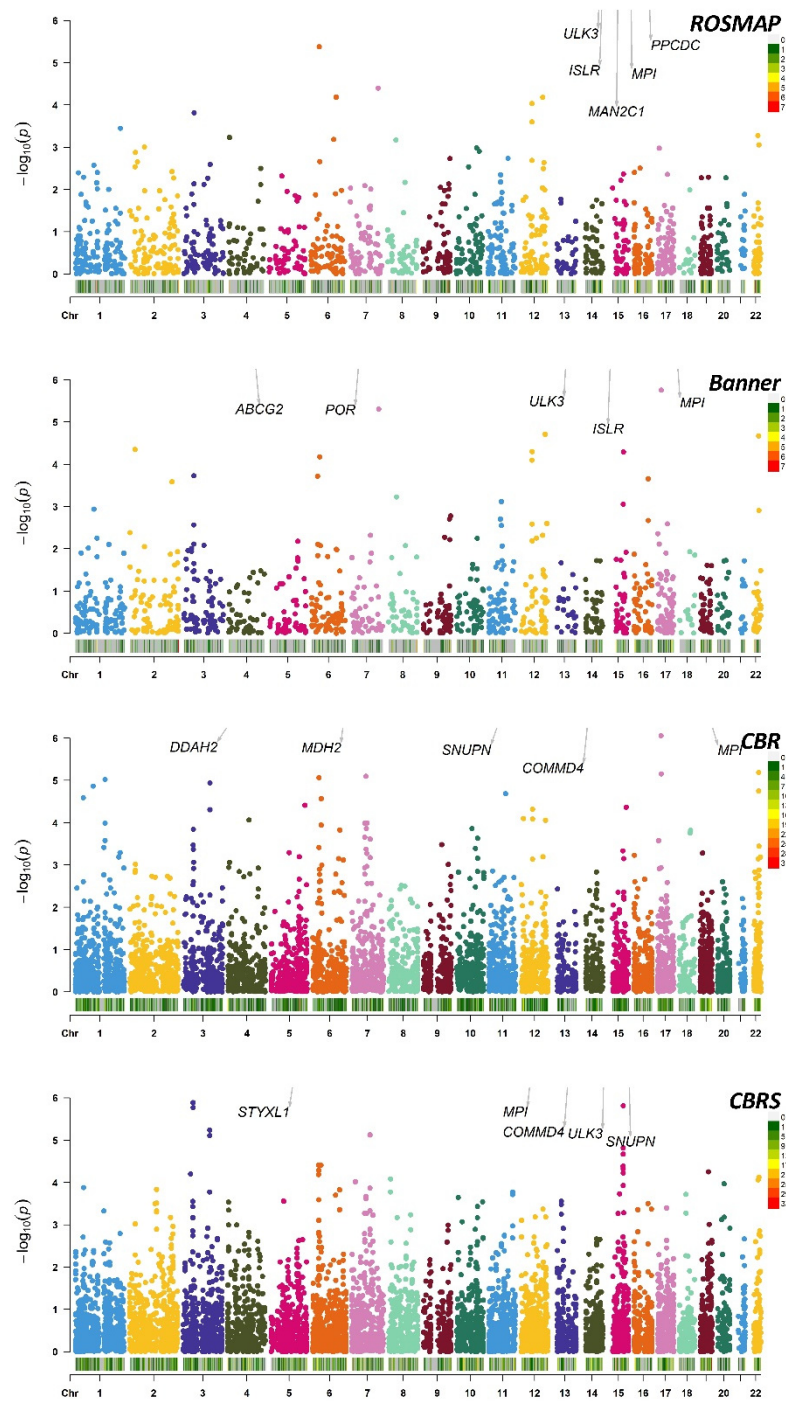

**Figure S5. Manhattan Plots of significant human brain proteins identified in PWAS and TWAS analysis for coffee**

Note: PWAS, proteome-wide association study; TWAS, transcriptome-wide association study. ROS/MAP and Banner means human brain proteomes for PWAS analysis; CBR and CBRS means two datasets of human brain gene expressions for TWAS analysis. Each point corresponds to a single test of association between a gene and phenotype, plotted according to genomic position on the x-axis and the strength of association ( $-\log_{10} P$ -value) on the y-axis. The five most statistically significant genes/proteins resulting from the analysis of each cohort were mapped out.

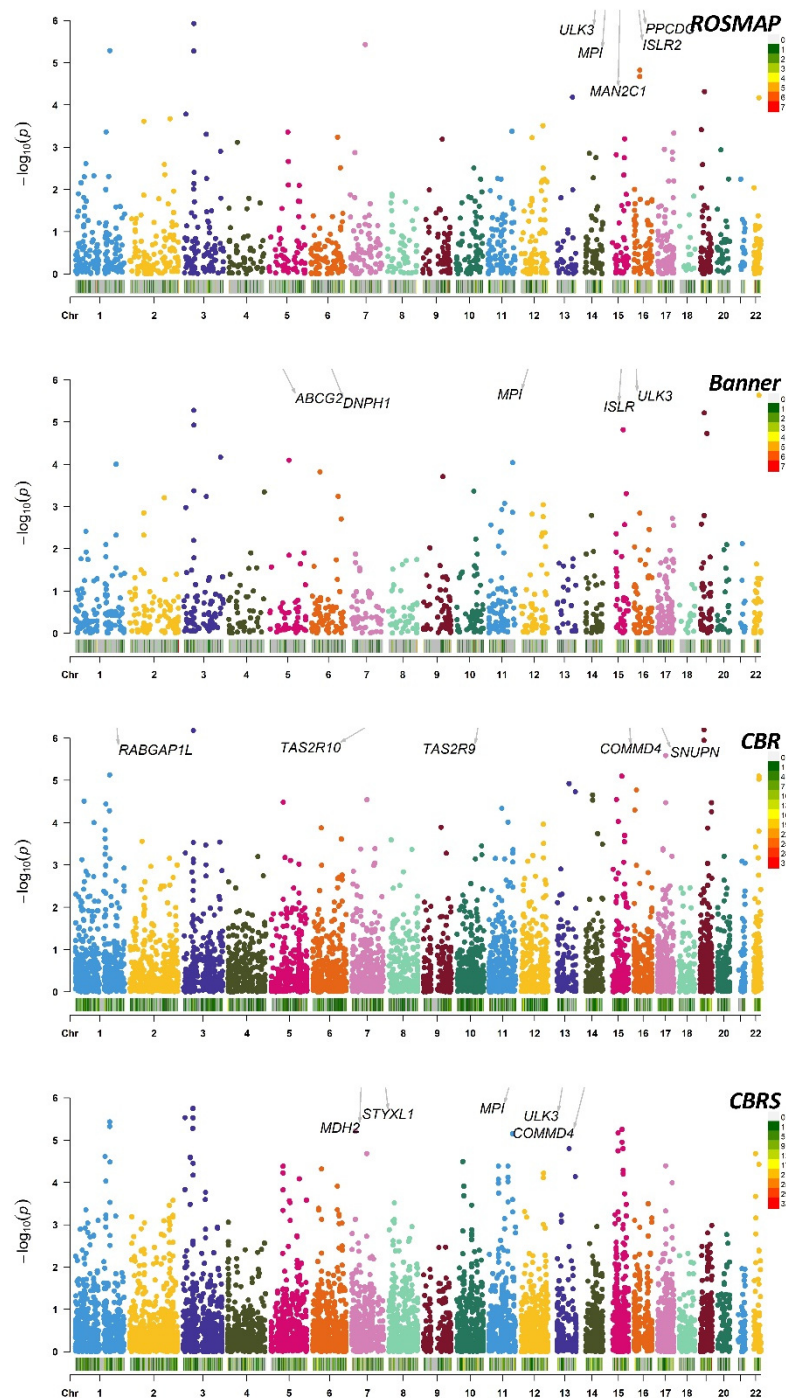

**Figure S6. Manhattan Plots of significant human brain proteins identified in PWAS and TWAS analysis for tea**

Note: PWAS, proteome-wide association study; TWAS, transcriptome-wide association study. ROS/MAP and Banner means human brain proteomes for PWAS analysis; CBR and CBRS means two datasets of human brain gene expressions for TWAS analysis. Each point corresponds to a single test of association between a gene and phenotype, plotted according to genomic position on the x-axis and the strength of association ( $-\log_{10} P$ -value) on the y-axis. The five most statistically significant genes/proteins resulting from the analysis of each cohort were mapped out.

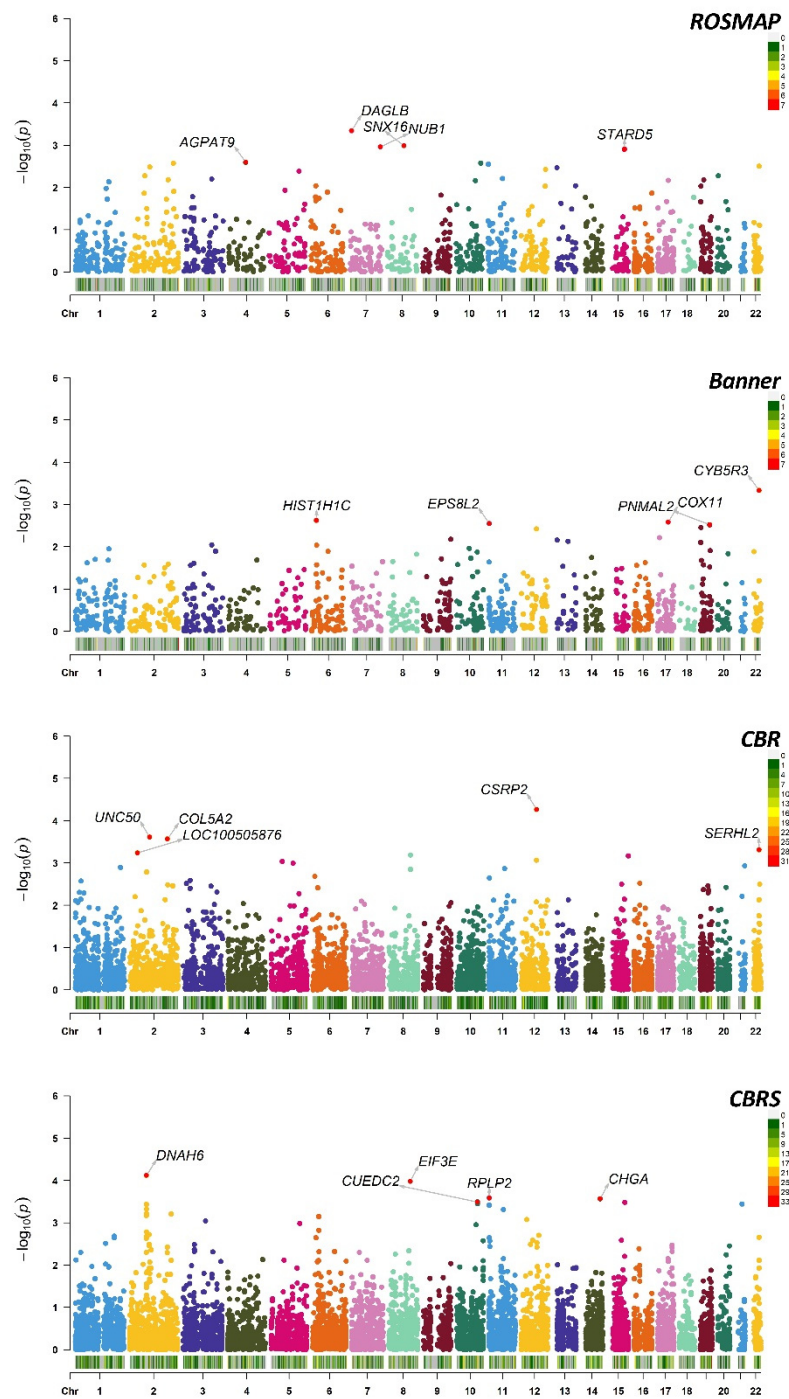

**Figure S7. Manhattan Plots of significant human brain proteins identified in PWAS and TWAS analysis for grape juice**

Note: PWAS, proteome-wide association study; TWAS, transcriptome-wide association study. ROS/MAP and Banner means human brain proteomes for PWAS analysis; CBR and CBRS means two datasets of human brain gene expressions for TWAS analysis. Each point corresponds to a single test of association between a gene and phenotype, plotted according to genomic position on the x-axis and the strength of association ( $-\log_{10} P$ -value) on the y-axis. The five most statistically significant genes/proteins resulting from the analysis of each cohort were mapped out.

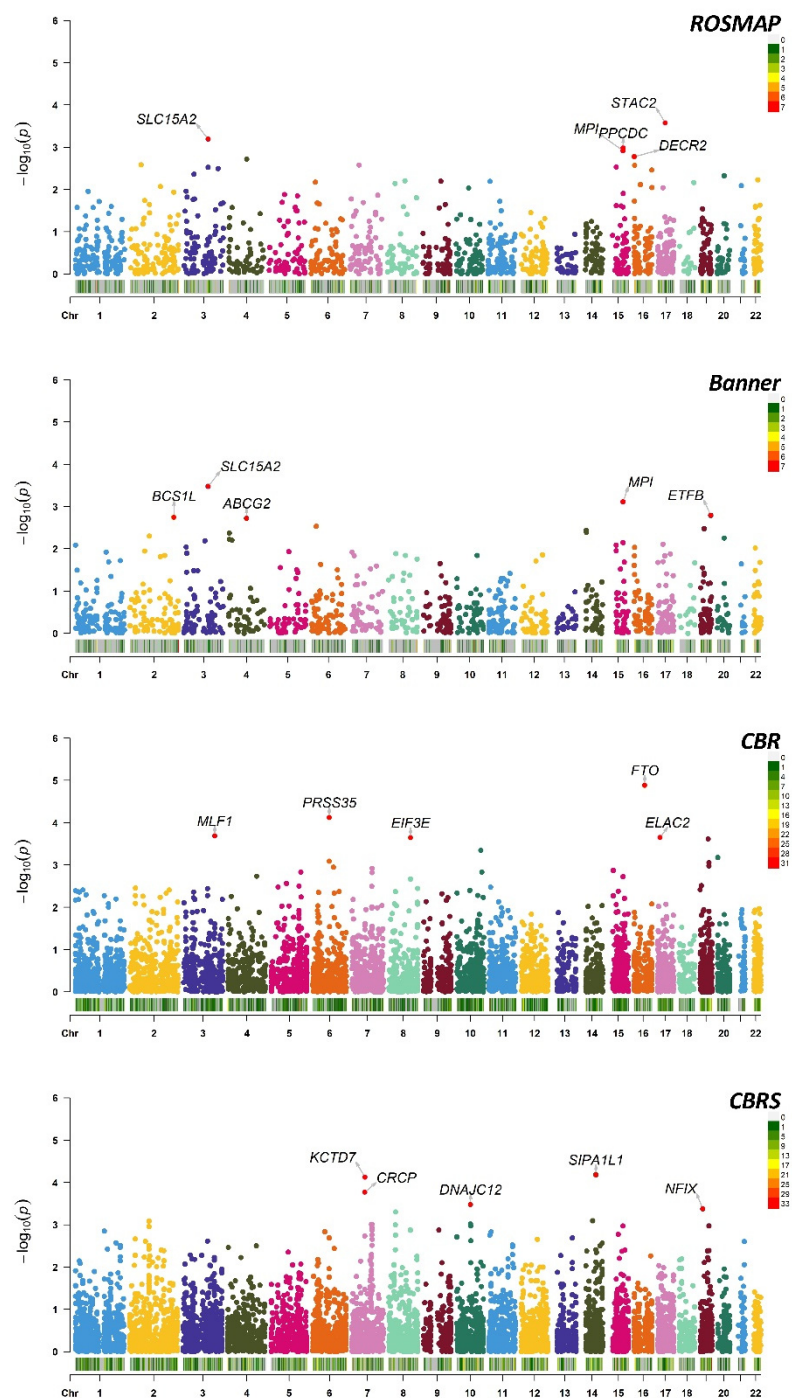

**Figure S8. Manhattan Plots of significant human brain proteins identified in PWAS and TWAS analysis for total sweet beverages**

Note: PWAS, proteome-wide association study; TWAS, transcriptome-wide association study. ROS/MAP and Banner means human brain proteomes for PWAS analysis; CBR and CBRS means two datasets of human brain gene expressions for TWAS analysis. Each point corresponds to a single test of association between a gene and phenotype, plotted according to genomic position on the x-axis and the strength of association ( $-\log_{10} P$ -value) on the y-axis. The five most statistically significant genes/proteins resulting from the analysis of each cohort were mapped out.



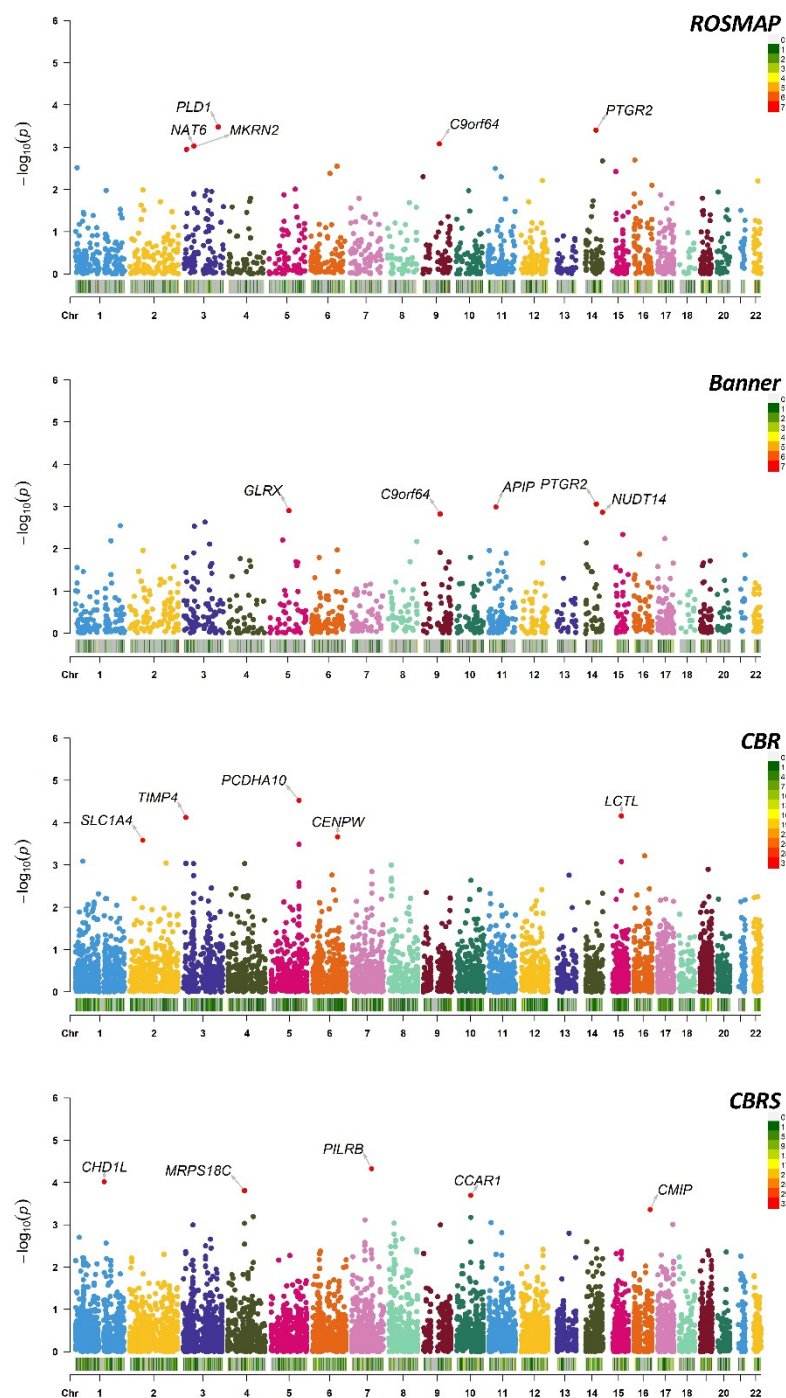

**Figure S9. Manhattan Plots of significant human brain proteins identified in PWAS and TWAS analysis for sugar-sweetened beverages**

Note: PWAS, proteome-wide association study; TWAS, transcriptome-wide association study. ROS/MAP and Banner means human brain proteomes for PWAS analysis; CBR and CBRS means two datasets of human brain gene expressions for TWAS analysis. Each point corresponds to a single test of association between a gene and phenotype, plotted according to genomic position on the x-axis and the strength of association ( $-\log_{10} P$ -value) on the y-axis. The five most statistically significant genes/proteins resulting from the analysis of each cohort were mapped out.

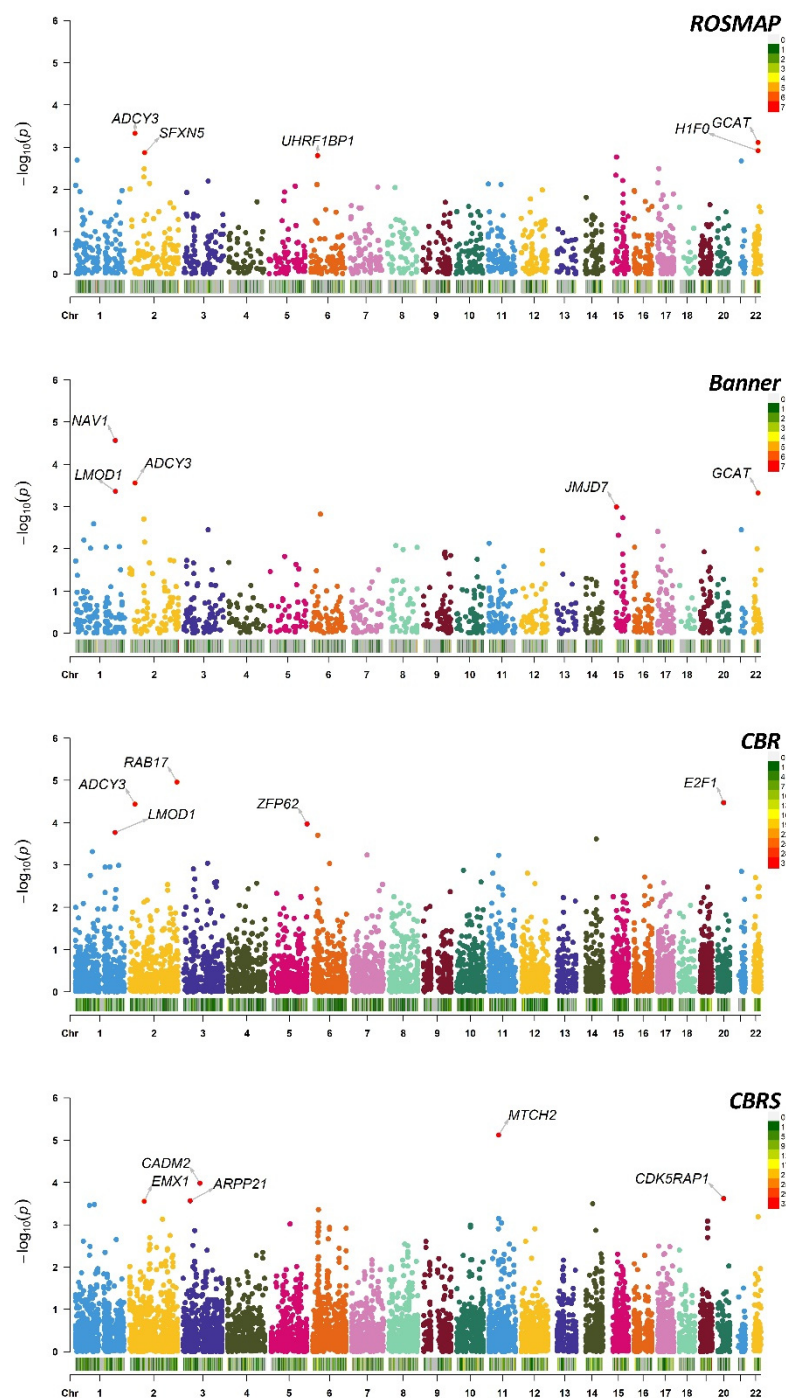

**Figure S10. Manhattan Plots of significant human brain proteins identified in PWAS and TWAS analysis for artificially sweetened beverages**

Note: PWAS, proteome-wide association study; TWAS, transcriptome-wide association study. ROS/MAP and Banner means human brain proteomes for PWAS analysis; CBR and CBRS means two datasets of human brain gene expressions for TWAS analysis. Each point corresponds to a single test of association between a gene and phenotype, plotted according to genomic position on the x-axis and the strength of association ( $-\log_{10} P$ -value) on the y-axis. The five most statistically significant genes/proteins resulting from the analysis of each cohort were mapped out.
