# Supplementary material for: Identification of Human Brain Proteins for Bitter-Sweet Taste Perception: A Joint Proteome-Wide and Transcriptome-Wide Association Study
Source: MDPI journal article supplement (doi:10.3390/nu14102177), 2022-05-23
Supplement: s1 [file s1]

**Table S1 Exploration of other brain regions**

| Beverage type                    | Genes         | PWAS (Permutation <i>P</i> value) |                       | TWAS (Permutation <i>P</i> value) |                        |                        |                           |                       |
|----------------------------------|---------------|-----------------------------------|-----------------------|-----------------------------------|------------------------|------------------------|---------------------------|-----------------------|
|                                  |               | ROS/MAP                           | Banner                | Frontal Cortex                    | Amygdala               | Cerebellum             | Anterior cingulate cortex | Hippocampus           |
| Bitter beverages                 |               |                                   |                       |                                   |                        |                        |                           |                       |
| Total                            | <i>ABCG2</i>  | 2.99×10 <sup>-3</sup>             | 3.05×10 <sup>-3</sup> | /                                 | /                      | /                      | /                         | /                     |
| Total                            | <i>CPNE1</i>  | 4.96×10 <sup>-3</sup>             | 1.34×10 <sup>-3</sup> | 1.6×10 <sup>-12</sup>             | 4.61×10 <sup>-08</sup> | /                      | 1.02×10 <sup>-07</sup>    | 7.2×10 <sup>-10</sup> |
| Alcoholic bitter beverages       | <i>FLOT2</i>  | 2.68×10 <sup>-2</sup>             | 1.76×10 <sup>-5</sup> | /                                 | /                      | /                      | /                         | /                     |
| Tea                              | <i>ABCG2</i>  | 7.65×10 <sup>-3</sup>             | 8.79×10 <sup>-3</sup> | /                                 | /                      | /                      | /                         | /                     |
| Sweet beverages                  |               |                                   |                       |                                   |                        |                        |                           |                       |
| Total                            | <i>FLOT2</i>  | 5.04×10 <sup>-3</sup>             | 4.04×10 <sup>-7</sup> | /                                 | /                      | /                      | /                         | /                     |
| Artificially sweetened beverages | <i>ACTR1B</i> | 9.62×10 <sup>-3</sup>             | 1.59×10 <sup>-2</sup> | /                                 | /                      | 1.91×10 <sup>-02</sup> | /                         | /                     |

Note: PWAS, proteome-wide association study; TWAS, transcriptome-wide association study. ROS/MAP and Banner means human brain proteomes for PWAS analysis; Frontal Cortex, Amygdala, Cerebellum, Anterior cingulate cortex and Hippocampus means five datasets of human brain gene expressions for TWAS analysis.
